# Supplementary material
Source: PubMed Central journal article supplement (PMC4096681)
Supplement: NIHMS596798-supplement-supplement.pdf [file NIHMS596798-supplement-supplement.pdf]

**Supplementary Information: Legends and Figures**

**Advanced CLARITY for rapid and high-resolution imaging of  
intact tissues**

Raju Tomer<sup>1,3,4</sup>, Li Ye<sup>1,3,4</sup>, Brian Hsueh<sup>1,4</sup>, and Karl Deisseroth<sup>1,2,3,4,5</sup>

<sup>1</sup>Department of Bioengineering

<sup>2</sup>Department of Psychiatry and Behavioral Sciences

<sup>3</sup>Howard Hughes Medical Institute

<sup>4</sup>CNC Program

Stanford University, Stanford, CA

<sup>5</sup>To whom correspondence should be addressed:  
Karl Deisseroth, M.D., Ph.D.  
Department of Bioengineering  
W083 Clark Center, 318 Campus Drive  
Stanford, CA 94305  
Phone: (650) 736-4325  
deissero@stanford.edu

## Supplementary Figure Legends

**Supplementary Figure S1.** Sample transparency at key stages of the CLARITY protocol. Pictures of representative brain samples are shown during the key stages of clarification: (a) hydrogel-embedded mouse brain, (b) after lipid removal, (c) after washing of the residual SDS micelle with PBST, and (d) after 2 hours of refractive index homogenization with FocusClear at 37°C with gentle shaking.

**Supplementary Figure S2.** Summary of the control electronics framework and COLM parts. FPGA logic is used to control and synchronize various parts of the microscope.

## Supplementary Movie Legends

**Supplementary Video 1.** Volume rendering of whole mouse brain volume acquired from an intact clarified Thy1-eYFP mouse brain using 10x magnification objective in COLM. The dataset was down-sampled 4 fold in each lateral pixel dimension to make the volume rendering feasible with current computing power. The entire image volume was acquired in ~4 hours.

**Supplementary Video 2.** Rendering of 3.15 mm x 3.15 mm x 5.3 mm volume acquired from an intact clarified Thy1-eYFP mouse brain using the 25x magnification objective in COLM. The dataset was down-sampled 2 fold in each lateral pixel dimension. The entire image volume was acquired in ~1.5 hours.

**Supplementary Video 3.** Rendering of 1.837 mm x 0.959 x 5 mm volume acquired from an intact clarified Thy1-eYFP mouse brain using the 25x magnification objective in a confocal microscope.

### Supplementary Figure S1

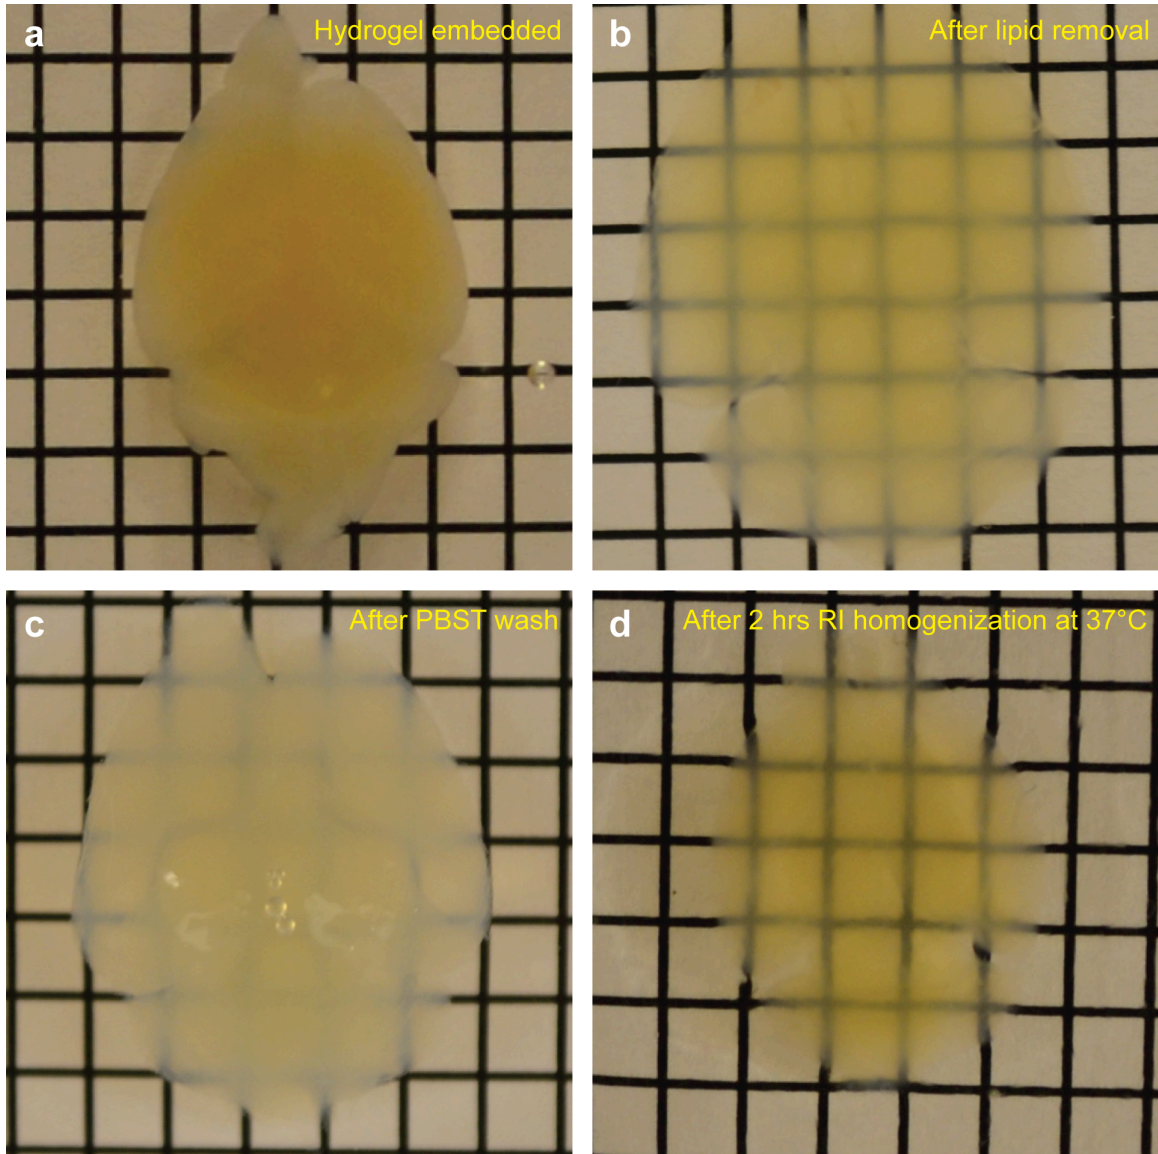

## Supplementary Figure S2

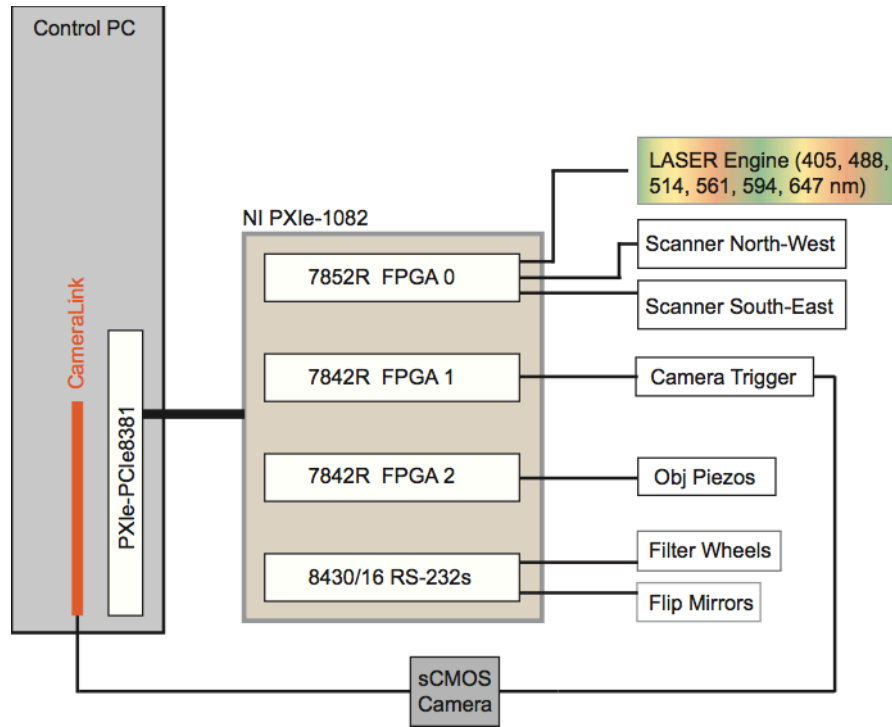

| COLM Parts                                 | Vendor               | Part number                                |
|--------------------------------------------|----------------------|--------------------------------------------|
| LASER engine                               | Omicron              | SOLE-6: 405, 488, 515, 561, 594, 647 nm    |
| Camera                                     | Hamamatsu            | Orca Flash 4.0 V2                          |
| Detection Objectives                       | Olympus              | 10X/0.6 and 25X/0.95 CLARITY               |
| Illumination Objectives                    | Olympus              | Macro 4X/0.28 NA (Qty=2)                   |
| XYZ-theta sample stage                     | Physik Instrumente   | Assembled from M-112K033 (Qty=3); M-116.DG |
| Sample chamber                             | Custom design        | Custom design                              |
| Illumination Filter Wheels + Smart shutter | Sutter               | FG-LB10-NWIQ (Qty=2)                       |
| Emission Filter Wheel                      | Sutter               | FG-LB10-W50                                |
| Galvo XY Scanners                          | Cambridge Tech       | 6215H XY mounted (Qty=2)                   |
| Tube lens                                  | Thorlabs             | ITL200 (Qty=3)                             |
| Scan lens                                  | Sill Optics          | S4LFT0061/065 (Qty=2)                      |
| Filters                                    | Semrock              | RazorEdge long pass and band pass filters  |
| Sample holder cuvette                      | Starna Cells         | Quartz cuvette                             |
| Sample holder adapter                      | Custom               | Custom                                     |
| FPGA                                       | National Instruments | 7852R (Qty=2), 7842R                       |
| PXI express chassis                        | National Instruments | PXIe-1082                                  |
| Serial card                                | National Instruments | 8430/16                                    |
| Objective piezos                           | Physik Instrumente   | Hera stages P-622.1CD (Qty=3)              |
